# Supplementary material for: RNASE2 Mediates Age-Associated B Cell Expansion Through Monocyte Derived IL-10 in Patients With Systemic Lupus Erythematosus
Source: PubMed Central journal article supplement (PMC8899663; doi:10.3389/fimmu.2022.752189), 2022-02-21
Supplement: DataSheet_1.pdf [file DataSheet_1.pdf]

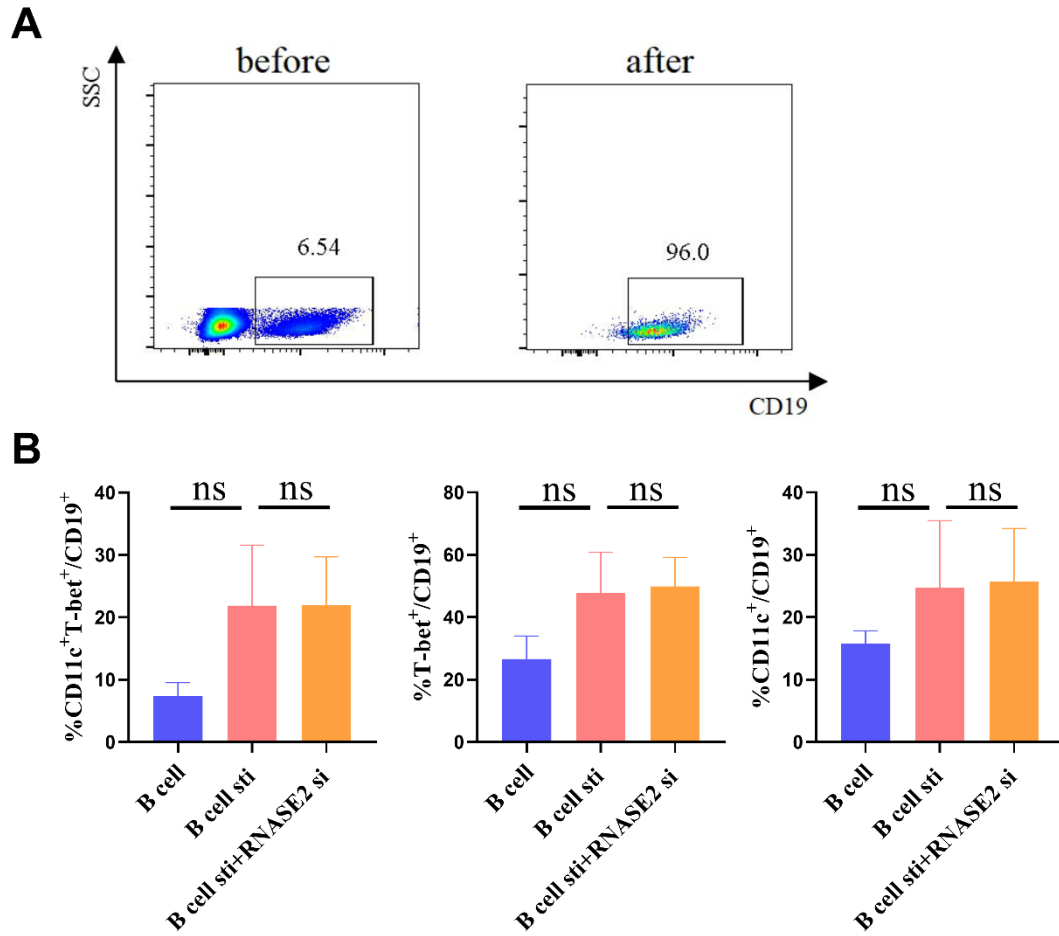

Supplementary figure 1. RNASE2 failed to modulate ABCs in B cell cultures. A, B cells were negative sorted from lupus PBMCs using magnetic beads, then CD19<sup>+</sup> B cells were verified up to 90% purity by flow cytometry. B, B cells were cultured with the stimulation of anti-CD40 and anti-IgM F(ab')<sub>2</sub>. Adding RNASE2 siRNA did not change the percentage of CD11c<sup>+</sup>T-bet<sup>+</sup> B cells.

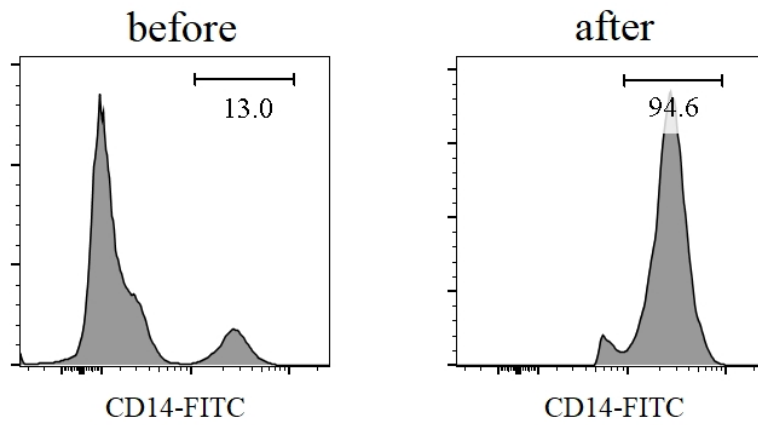

Supplementary figure 2. Purification of monocytes using magnetic beads. CD14<sup>+</sup> monocytes were positively sorted using magnetic beads, and an over 90% purity was detected by flow cytometry.

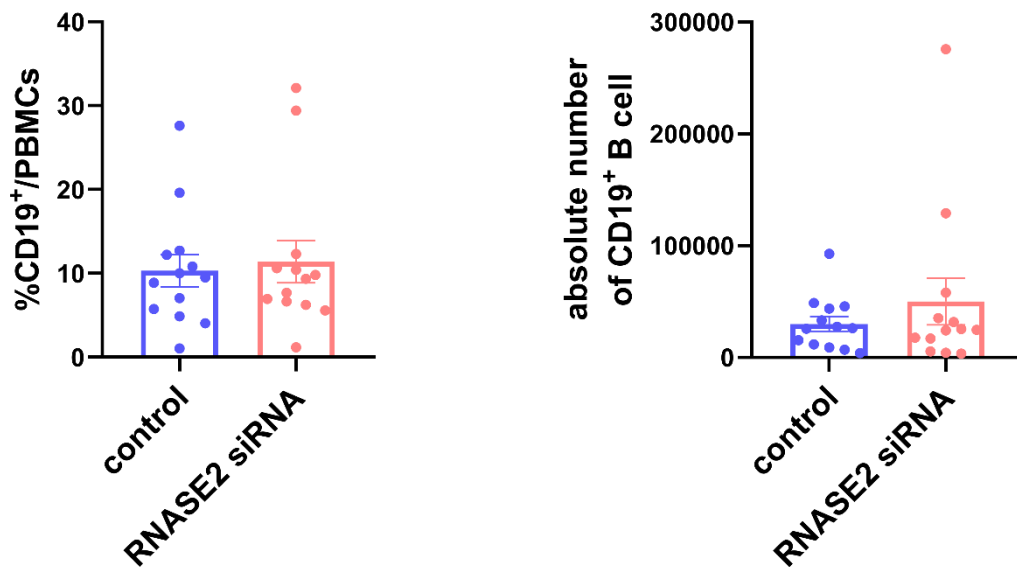

Supplementary figure 3. RNASE2 silence effect on total B cells. The proportion and absolute number of total B cells in PBMCs showed no significant difference after RNASE2 silencing by flow cytometry (n=13)

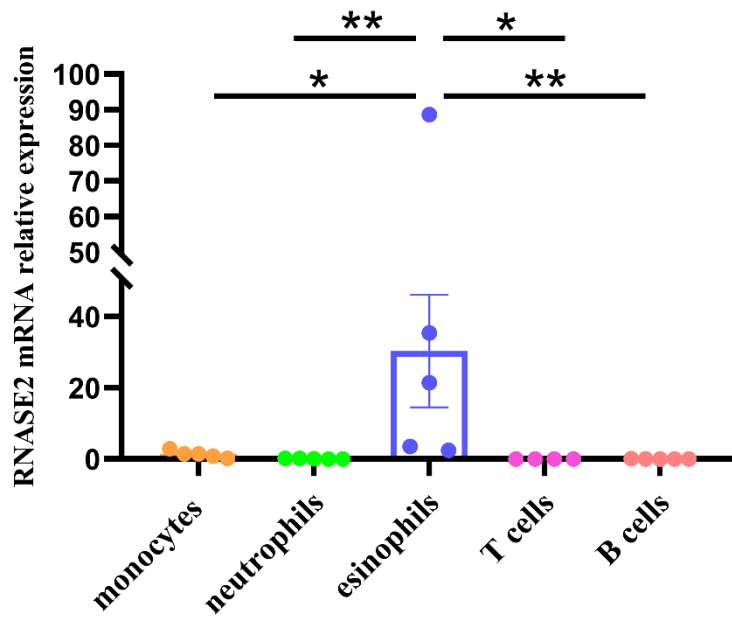

Supplementary figure 4. RNASE2 was mainly derived from eosinophils in normal subjects. The mRNA expression level of RNASE2 in monocytes (CD45<sup>+</sup>CD14<sup>+</sup>), neutrophils (SSC<sup>high</sup>CD45<sup>+</sup>CD14<sup>-</sup>CD16<sup>+</sup>), T cells (CD45<sup>+</sup>CD3<sup>+</sup>) and B cells (CD45<sup>+</sup>CD19<sup>+</sup>) were almost undetectable. \*p < 0.05, \*\*p < 0.01.

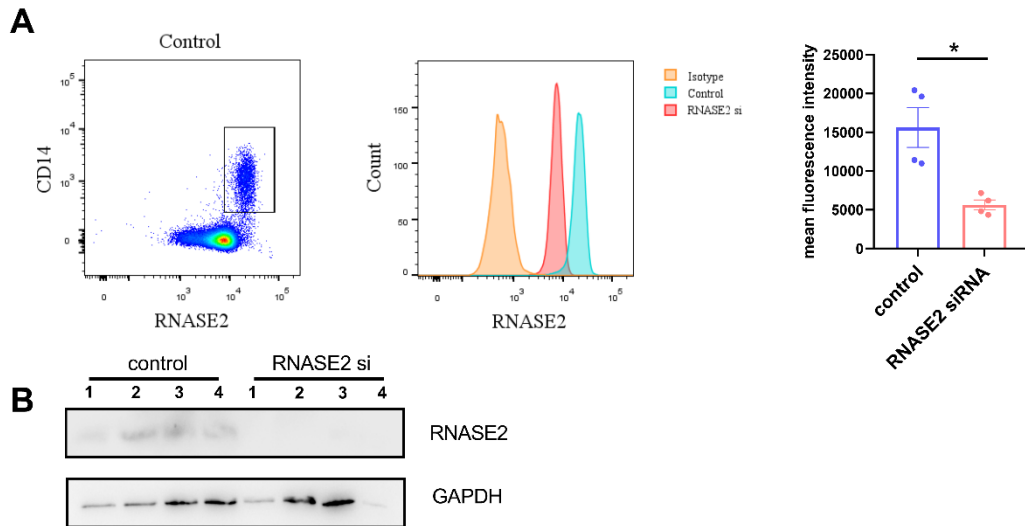

Supplementary figure 5. RNASE2 protein level decreased in SLE monocytes after RNASE2 silence. A, Decreased mean fluorescence intensity of RNASE2 protein level in CD14<sup>+</sup> monocytes after RNASE2 silence by flow cytometry (n=4). B, Reduced RNASE2 protein level after RNASE2 silence by western blot (n=4).

Supplementary table 1. siRNA sequences of RNASE2 and non-targeting control.

|                     | sense                     | antisense                 |
|---------------------|---------------------------|---------------------------|
| RNASE2-1            | 5'-GACCUGUCCUAGUAACAAA-3' | 5'-UUUGUUACUAGGACAGGUC-3' |
| RNASE2-2            | 5'-CCCAUCUCUCCAUAUACUU-3' | 5'-AAGUAUAUGGAGAGAUGGG-3' |
| RNASE2-3            | 5'-UACCUGGGCUCAAUGGUUU-3' | 5'-AAACCAUUGAGCCCAGGUA-3' |
| RNASE2-4            | 5'-CAGUUCACCUGGAUAGAAU-3' | 5'-AUUCUAUCCAGGUGAACUG-3' |
| Non-targeting siRNA | 5'-UUCUCCGAACGUGUCACGU-3' | 5'-ACGUGACACGUUCGGAGAA-3' |

Supplementary table 2. Primers for mRNA detection.

| gene   | GenBank number | Primer sequence                 |
|--------|----------------|---------------------------------|
| RNASE2 | NM_002934      | F: 5'-ACCTCACAACCTCCAAGTCCA-3'  |
|        |                | R: 5'-GGATACTGTGGAGGGTCTCG-3'   |
| IL-10  | NM_000572.3    | F: 5'-TACGGCGCTGTCATCGATTT-3'   |
|        |                | R: 5'-ACTCATGGCTTTGTAGATGCCT-3' |
| GAPDH  | NM_002046      | F: 5'-ATGGGGAAGGTGAAGGTCG-3'    |
|        |                | R: 5'-GGGGTCATTGATGGCAACAATA-3' |

Supplementary table 3. Demographics of the patients.

| Characteristics                    | SLE<br>(n=60) | RA<br>(n=20) | SS<br>(n=20) |
|------------------------------------|---------------|--------------|--------------|
| Age, mean±SD (years)               | 39.5±13.3     | 58.4±14.0    | 46.9±13.0    |
| Sex, no. male/female               | 4/56          | 3/17         | 1/20         |
| Disease duration (months)          | 8.7±9.0       | —            | —            |
| SLEDAI score                       | 6.1±4.0       | —            | —            |
| BILAG score                        | 5.3±3.7       | —            | —            |
| Clinical Characteristics           |               |              |              |
| Malar Rash                         | 35(58.3%)     | —            | —            |
| Photosensitivity                   | 15 (25%)      | —            | —            |
| Oral ulcers                        | 8 (13.3%)     | —            | —            |
| Arthritis                          | 34 (56.7%)    | —            | —            |
| Pleuritis or Pericarditis          | 10 (16.7%)    | —            | —            |
| Renal Disorder                     | 45 (75%)      | —            | —            |
| Neurologic Disorder                | 2 (3.3%)      | —            | —            |
| Hematologic Disorder               | 13 (21.6%)    | —            | —            |
| Laboratory test                    |               |              |              |
| WBC, mean±SD (x10 <sup>9</sup> /L) | 6.5±1.7       | —            | —            |
| IgG, mean±SD (g/L)                 | 10.0±2.6      | —            | —            |
| IgM, mean±SD (g/L)                 | 1.0±0.2       | —            | —            |
| C3, mean±SD (g/L)                  | 0.9±0.3       | —            | —            |
| C4, mean±SD (g/L)                  | 0.1±0.0       | —            | —            |
| ESR (mm/h)                         | 41.8±16.8     | —            | —            |
| CRP (mg/L)                         | 31.7±15.1     | —            | —            |
| Urine protein (mg/24h)             | 1067.0±398.4  | —            | —            |
| Positive ANA, n (%)                | 56(93.3%)     | —            | —            |
